# Supplementary material for: Lack of retinoid acid receptor-related orphan receptor alpha accelerates and melatonin supplementation prevents testicular aging
Source: Aging (Albany NY). 2020 Jul 9;12(13):12648–68. doi: 10.18632/aging.103654 (PMC7377884; doi:10.18632/aging.103654)
Supplement: Supplementary Figure 1 [file aging-12-103654-s001..pdf]

## SUPPLEMENTARY FIGURE

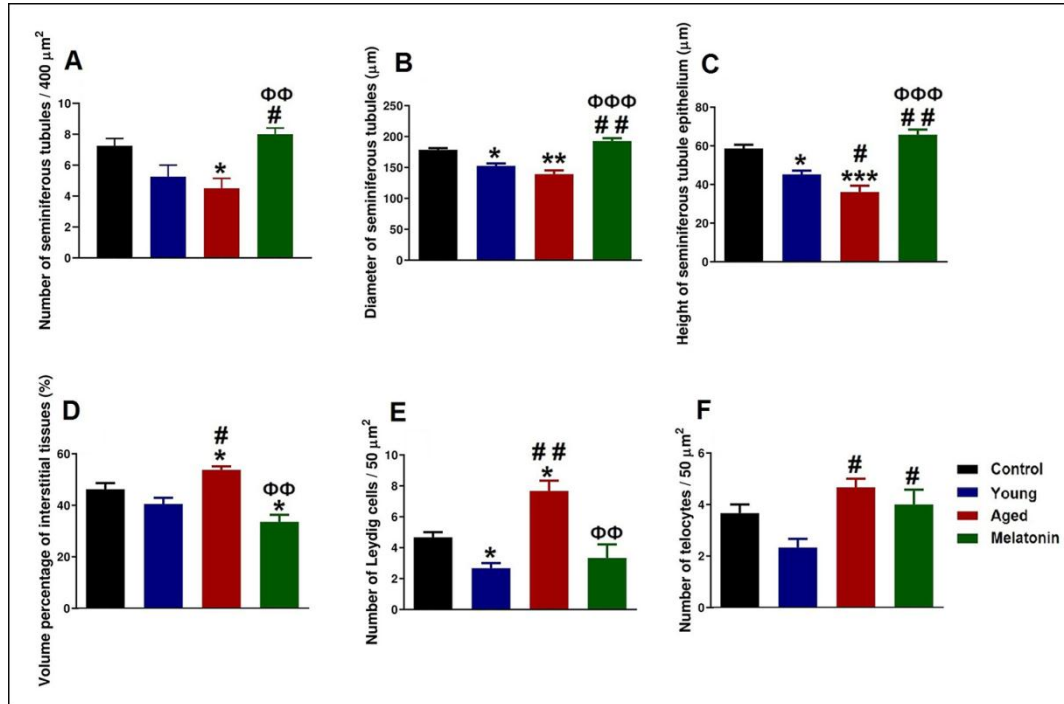

**Supplementary Figure 1.** Morphometrical analysis of seminiferous tubules number (A) and diameter (B), height of seminiferous tubules epithelium (C), volume percentage of the interstitial tissues (D), number of Leydig cells (E) and telocytes (F) in young and aged mice. \*  $p < .05$ , \*\*  $p < .01$  and \*\*\*  $p < .001$  vs. Control; #  $p < .05$  and ##  $p < .01$  vs. Young;  $\Phi\Phi$   $p < .01$  and  $\Phi\Phi\Phi$   $p < .001$  vs. Aged.
